# Supplementary material
Source: publisher figshare collection journal article supplement (https://acs.figshare.com/ndownloader/files/4374226)
Supplement: Supplementary file 1 [file 4374226]

## SUPPORTING INFORMATION

**Title:** Three-dimensional Positron Emission Tomography/Computed Tomography Analysis of  $^{13}\text{NO}_3^-$  Uptake and  $^{13}\text{N}$  Distribution in Growing Kohlrabi

**Author:** Wansheng Liang,<sup>†,‡</sup> Yingchun Nie,<sup>†</sup> Jun Wang,<sup>‡</sup> Jing Wu,<sup>‡</sup> Hui Liu,<sup>‡</sup> Qi Wang,<sup>‡</sup> Lijuan Huang<sup>†</sup>, Hao Guo,<sup>§</sup> Boxue Shu,<sup>§</sup> Jiagen Lv<sup>\*†</sup>

<sup>†</sup>Key Laboratory of Analytical Chemistry for Life Science of Shaanxi Province

<sup>‡</sup>Changan Hospital

<sup>§</sup>Xi'an Gaoxin Hospital

**\*Correspondence author. E-mail:** lvjg413@sohu.com

This supporting information includes:

**Figure S-1:** Fused PET/CT tomograms from coronal direction for plant No.1, 42 min after  $^{13}\text{NO}_3^-$  was supplied.

**Movie S-1:** Complete PET movies, exported from both of Xeleris and Minvista, for  $^{13}\text{N}$  imaging in plant No.1 under normal growth condition corresponding to 7, 14, 28, 35, 42, and 49 min after  $^{13}\text{NO}_3^-$  was supplied.

**Movie S-2:** Complete PET movies for  $^{13}\text{N}$  imaging in plant No.2 under normal growth condition corresponding to 10, 20, 29, 39, 49, and 67 min after  $^{13}\text{NO}_3^-$  was supplied.

**Movie S-3:** Complete PET movies for  $^{13}\text{N}$  imaging in plant No.3 under growth conditions of normal, MSX-stressed, and recovery-from-MSX stress.

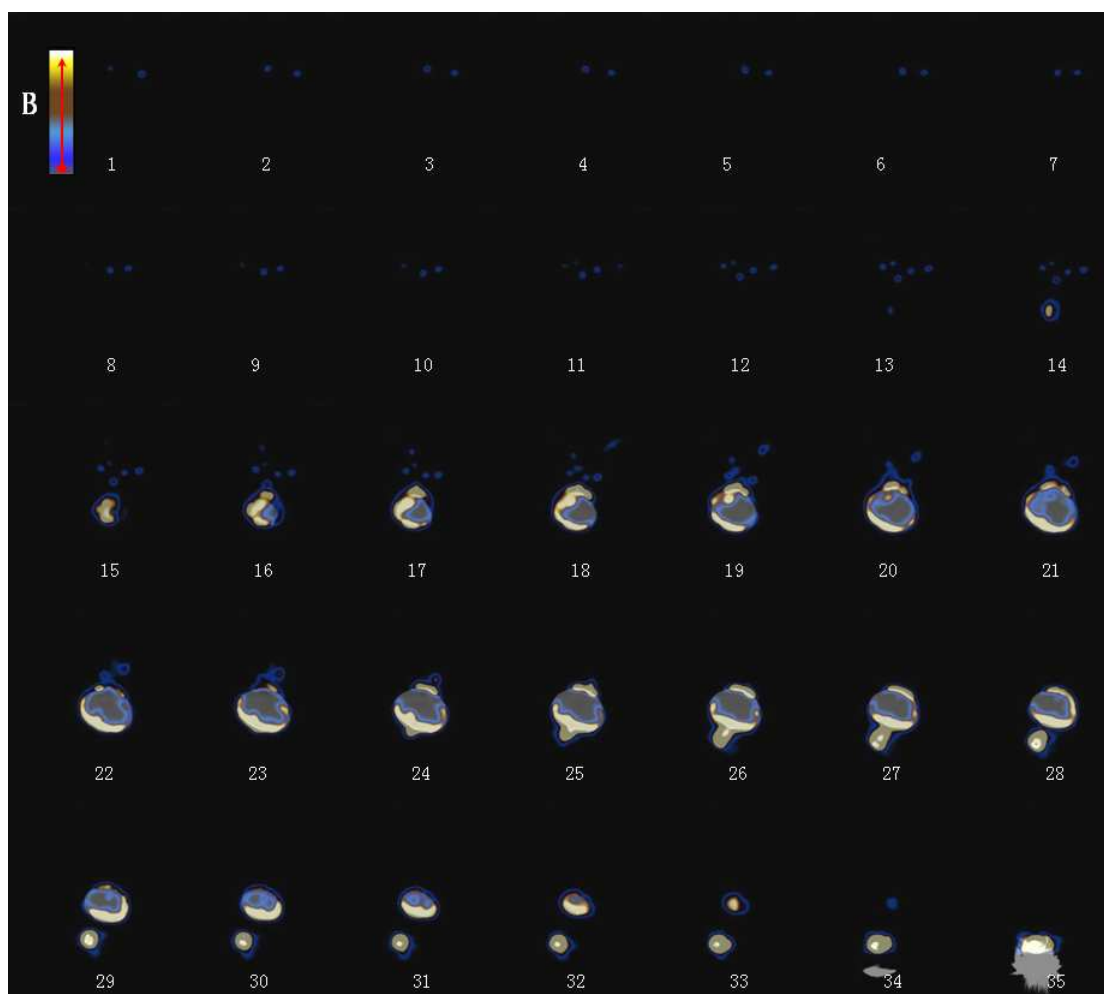

**Figure S-1:** Fused PET/CT tomograms from coronal direction for plant No.1, scanned 42 min after  $^{13}\text{NO}_3^-$  was supplied. The tomogram sequence is numbered in white. Color bar indicates the relative radiation intensity.
